# Supplementary material for: Structure of the RZZ complex and molecular basis of its interaction with Spindly
Source: PubMed Central journal article supplement — J Cell Biol. 2017 Apr 3;216(4):961–81. doi: 10.1083/jcb.201611060 (PMC5379955; doi:10.1083/jcb.201611060), 2017-04-03
Supplement: JCB_201611060_sm.pdf [file JCB_201611060_sm.pdf]

Mosalaganti et al., <https://doi.org/10.1083/jcb.201611060>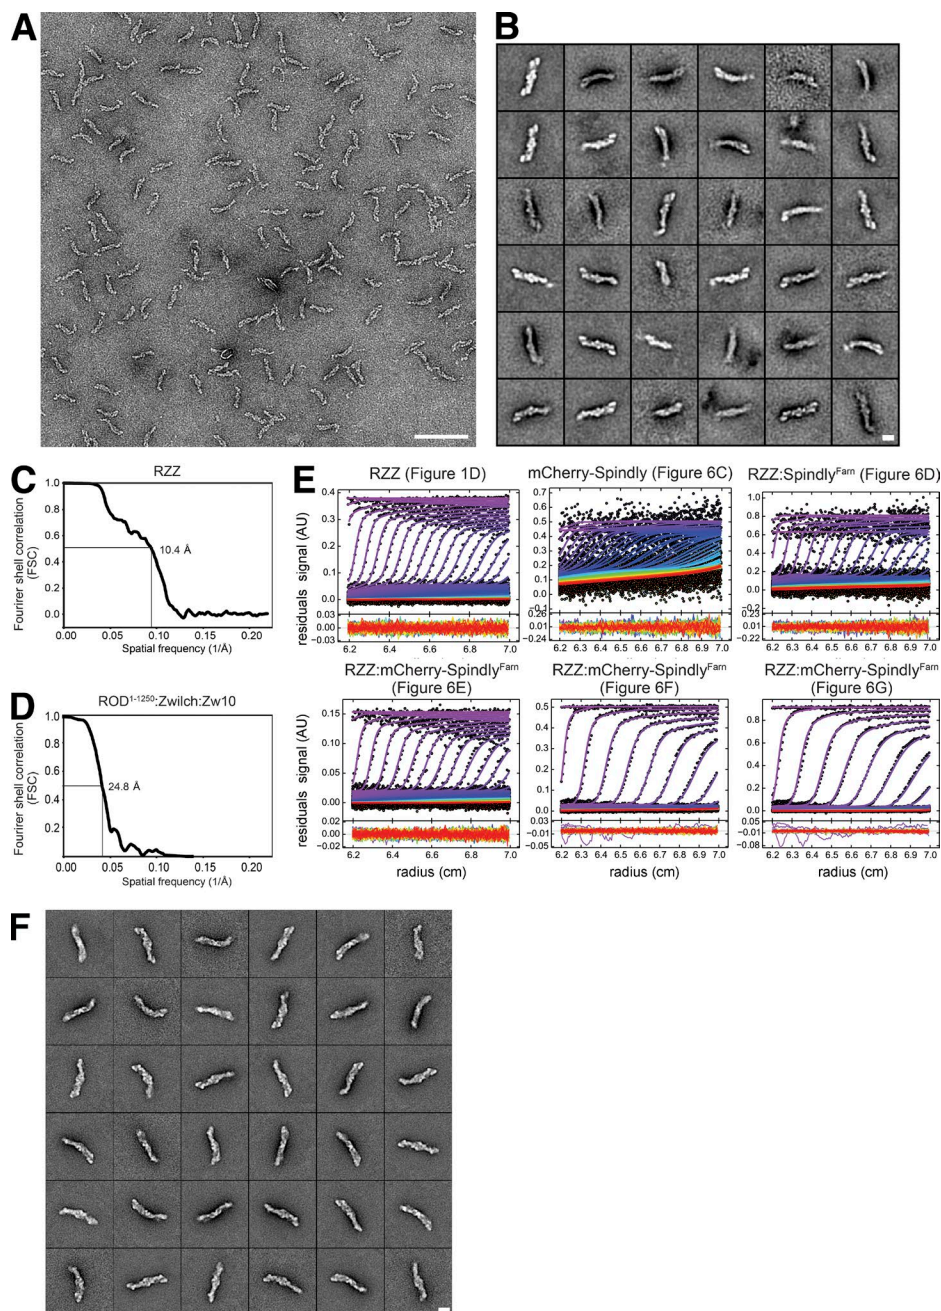

Figure S1. **Additional EM data.** (A) Raw micrograph area of the negatively stained RZZ complex, displaying elongated particles. (B) Gallery of  $m$  obtained from the ISAC procedure implemented in SPARX. (C) FSC for cryo-EM reconstruction of the RZZ complex. The FSC0.5 value is shown. (D) FSC curve for the negative stain reconstruction of the ROD1<sup>1-1,250</sup>ZZ complex. FSC0.5 value is shown. (E) Sedimentation velocity absorbance profiles of the indicated species, with residuals of the fit showing the deviation of the  $c(S)$  model from the observed signals. AU, arbitrary units. (F) Class averages of negatively stained RZZ-Spindly as calculated by ISAC. Compared with class averages of negatively stained RZZ, no additional density can be readily observed. Bars: (A) 100 nm; (B and F) 10 nm.

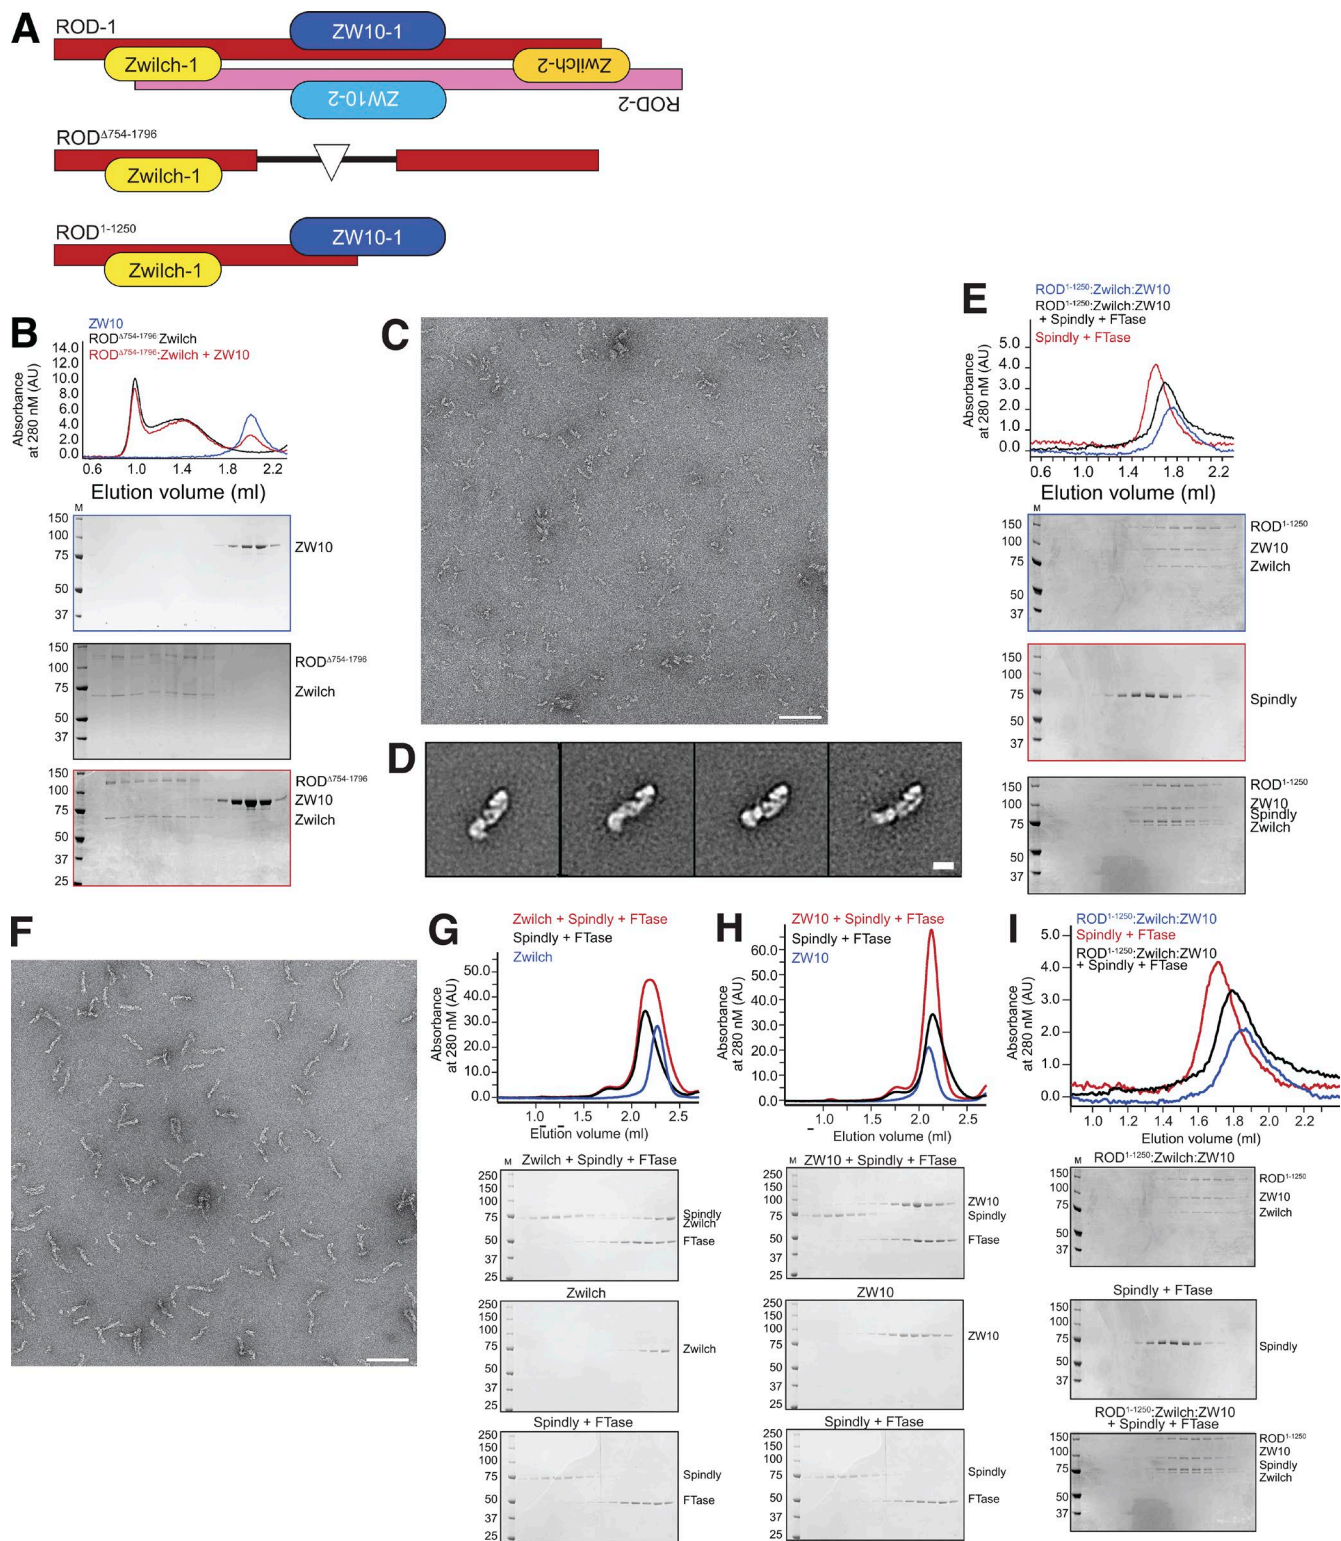

Figure S2. **Structural organization and biochemical properties of RZZ mutants and further characterization of RZZ-Spindly interaction.** (A) Schematic view of the full-length RZZ complex and of the  $ROD^{\Delta 754-1796}$  and  $ROD^{1-1250}$  constructs. (B) SEC analysis of  $ROD^{\Delta 754-1796}$ -Zwisch, ZW10, and their stoichiometric combination shows a lack of binding interaction. (C) Micrograph area of the negatively stained  $ROD^{1-1250}ZZ$  complex. (D) Typical class averages of the  $ROD^{1-1250}ZZ$  complex. (E) SEC analysis of  $ROD^{1-1250}$ -Zwisch:ZW10, Spindly (after treatment with FTase and Fpp), and their stoichiometric combination shows binding, with Spindly interacting stoichiometrically with  $ROD^{1-1250}ZZ$ . (F) Digital micrograph of negatively stained RZZ-Spindly<sup>Forn</sup> complexes. Bars: (C and F) 100 nm; (D) 10 nm. (G-I) SEC and SDS-PAGE analysis of the indicated species. For the control sample indicated as Spindly + FTase, the same SEC elution profile and SDS-PAGE are displayed in G and H. AU, arbitrary units; M, molecular weight marker.

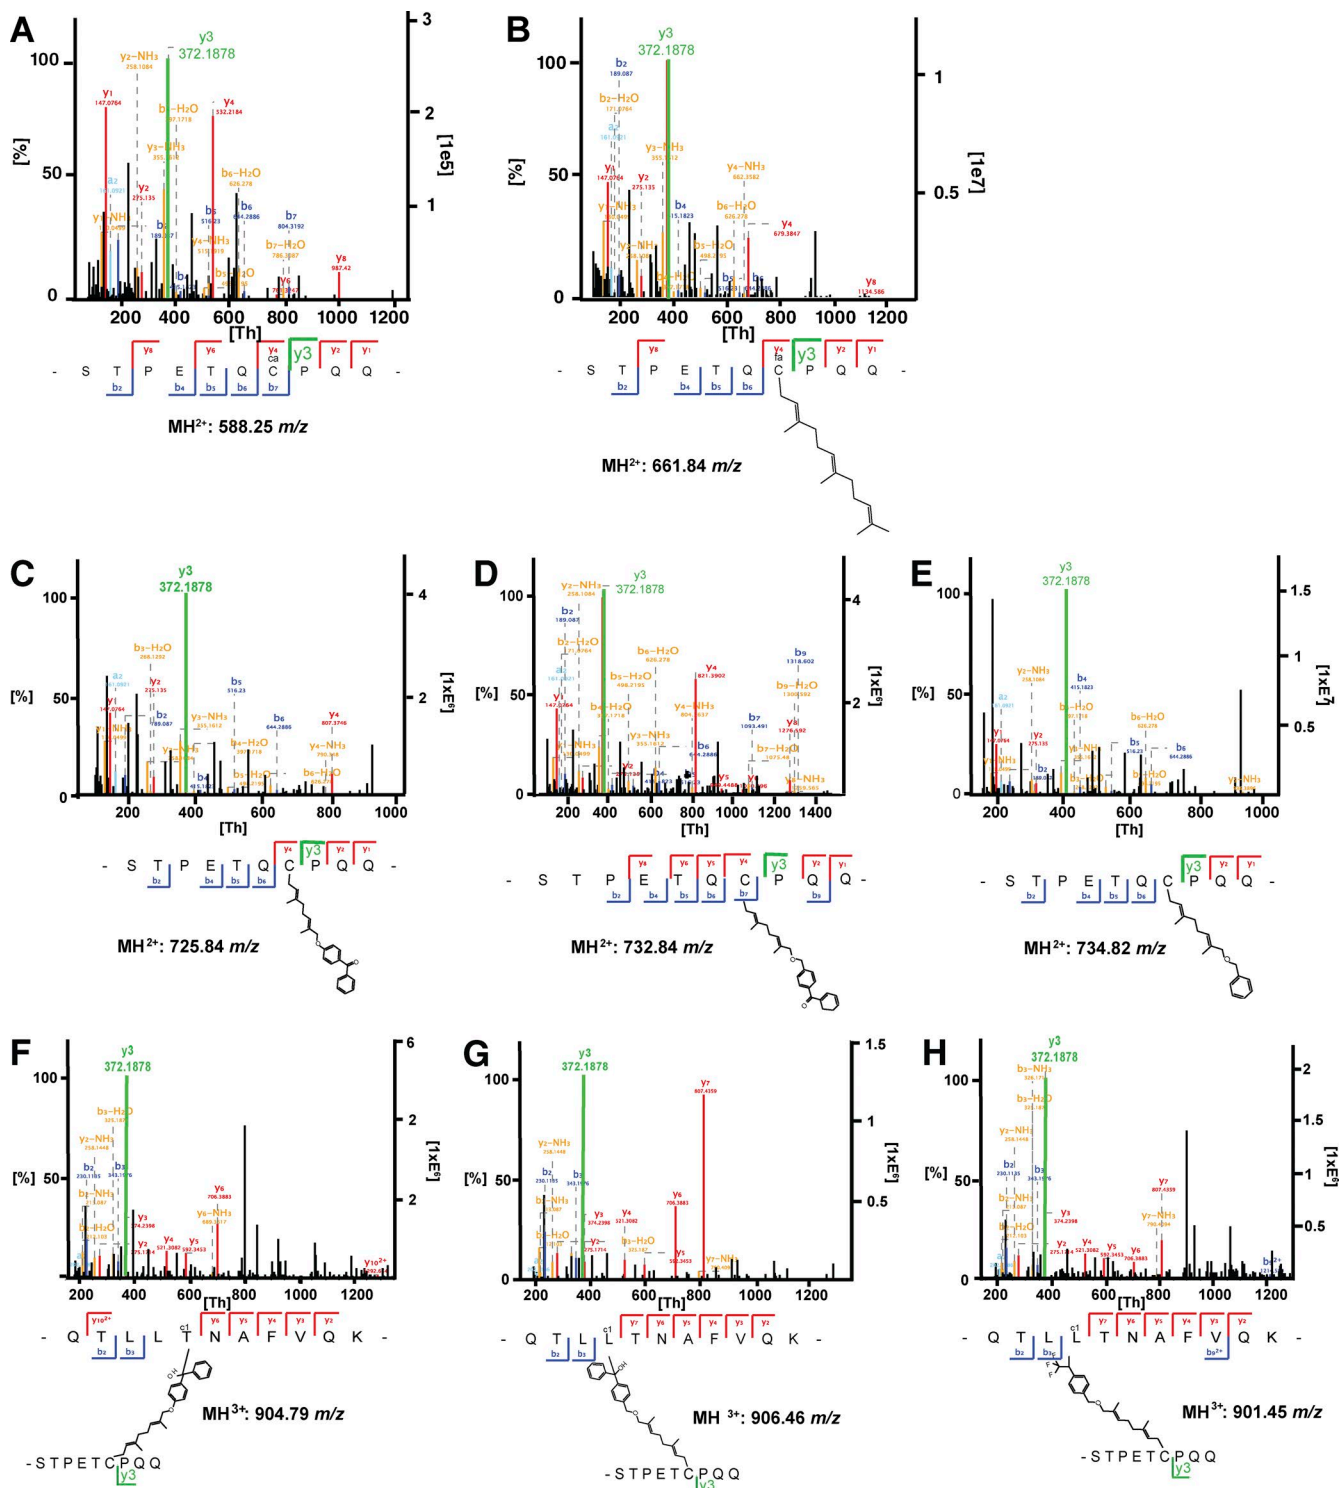

Figure S3. **MS/MS spectra of identified cross-links between farnesylated Spindly and RZZ.** (A and B) Spindly that was in vitro farnesylated or not, digested, and subjected to mass spectrometric analysis. MS/MS spectrum of the unmodified (A) and modified (B) C-terminal peptide of Spindly (aa 596–605). (C–H) Examples of MS/MS spectra for the C-terminal tryptic peptide (residues 596–605) of Spindly farnesylated with BPP1 (C); BPP2 (D); and diazirine (E); the bottom series (F–H) shows examples of MS/MS spectra for the identified cross-link between farnesylated spindly and RZZ Leu120 (within the peptide 117–127) with the same order of UV-photoactivatable cross-linkers as in A–C. For every spectrum, the sequence, identified b and y ions, and the  $m/z$  mass of the corresponding MS peak are indicated in each spectrum. The  $y_3$  ion fragment is indicated in green because it was used as diagnostic peak to identify cross-links and to highlight its presence in all spectra.

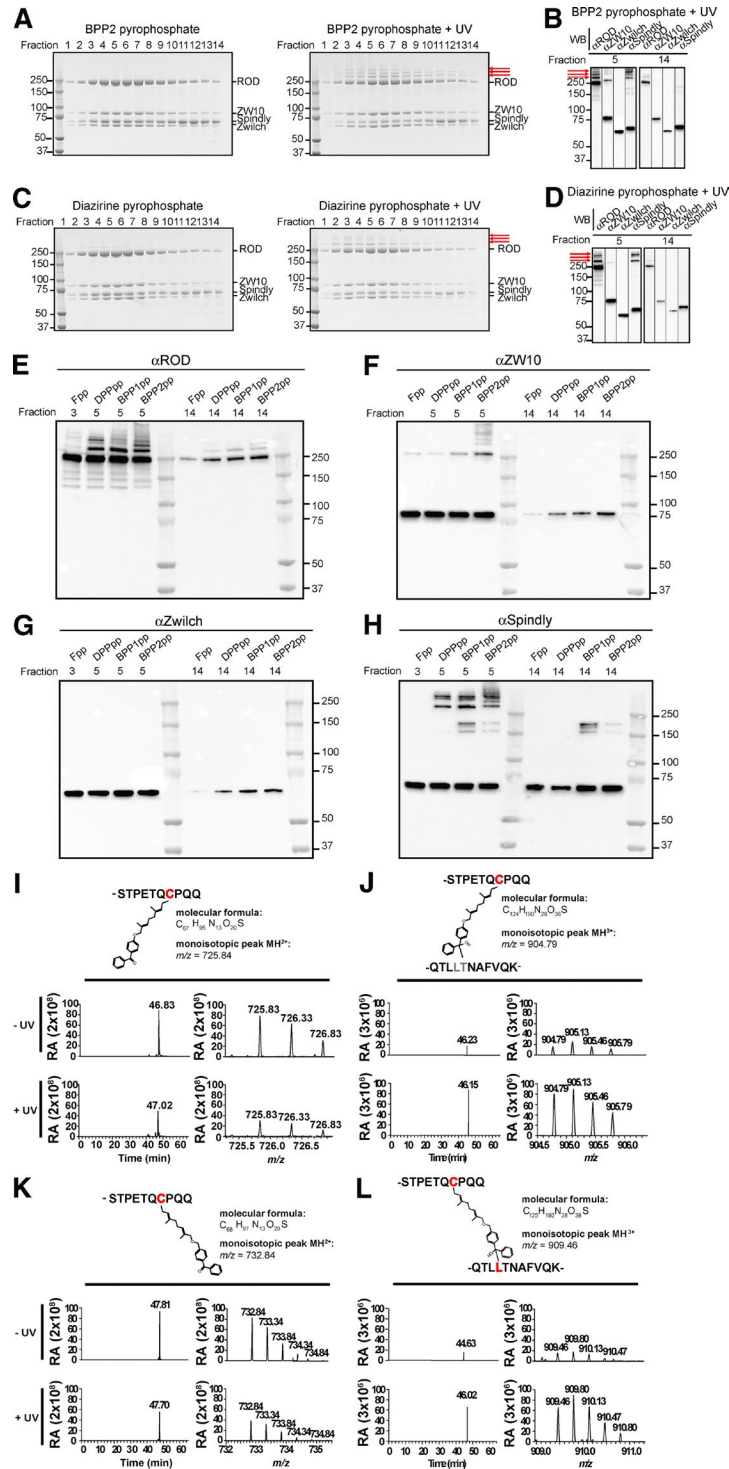

**Figure S4. Cross-links between the farnesyl-modified spindly and RZZ and MS analysis of UV-photoactivated cross-links.** (A and C) Spindly (in the presence of RZZ) was incubated with Ftase and Fpp variants carrying BPP2 or diazirine. After separation by SEC, elution fractions were subjected to UV irradiation and visualized by Coomassie staining of SDS-PAGE gels. UV-induced extra bands (the most prominent of which are indicated by red arrows) appear. Equivalent experiments with BPP1 are shown in Fig. 7 C. (B and D) Western blotting analysis of indicated selected fractions (from SDS-PAGE in A and C) with antibodies against ROD, ZW10, Zwlich, and Spindly. (E–H) The complete Western blots from B and D in this figure and from Fig. 7 D were obtained. Molecular mass is indicated in kilodaltons. (I and J) Spindly was farnesylated in vitro with farnesyl derivatives containing the photoreactive cross-linker BPP1 (I) and BPP2 (J). Farnesylated Spindly in complex with RZZ was digested before UV irradiation and analyzed by MS. C-terminal tryptic peptides (residues 596–605) of farnesylated Spindly were found to be modified with BPP1 (I) or BPP2 (J). (K and L) Cross-link between the C-terminal tryptic peptide of farnesylated Spindly and a tryptic peptide of ROD spanning aa 117–127 with BPP1 (K) and BPP2 (L). At the top of each panel is a scheme of the peptide, and the attached farnesyl derivative is depicted together with the elemental composition and the calculated monoisotopic peak. All amino acids with identified cross-links are marked in red. For each panel, left traces show the chromatographic peak, and right traces show the isotopic pattern of the corresponding peptide identified in the MS survey scan. Upper traces represent samples before UV treatment, and lower traces represent samples after UV treatment. RA, relative abundance.

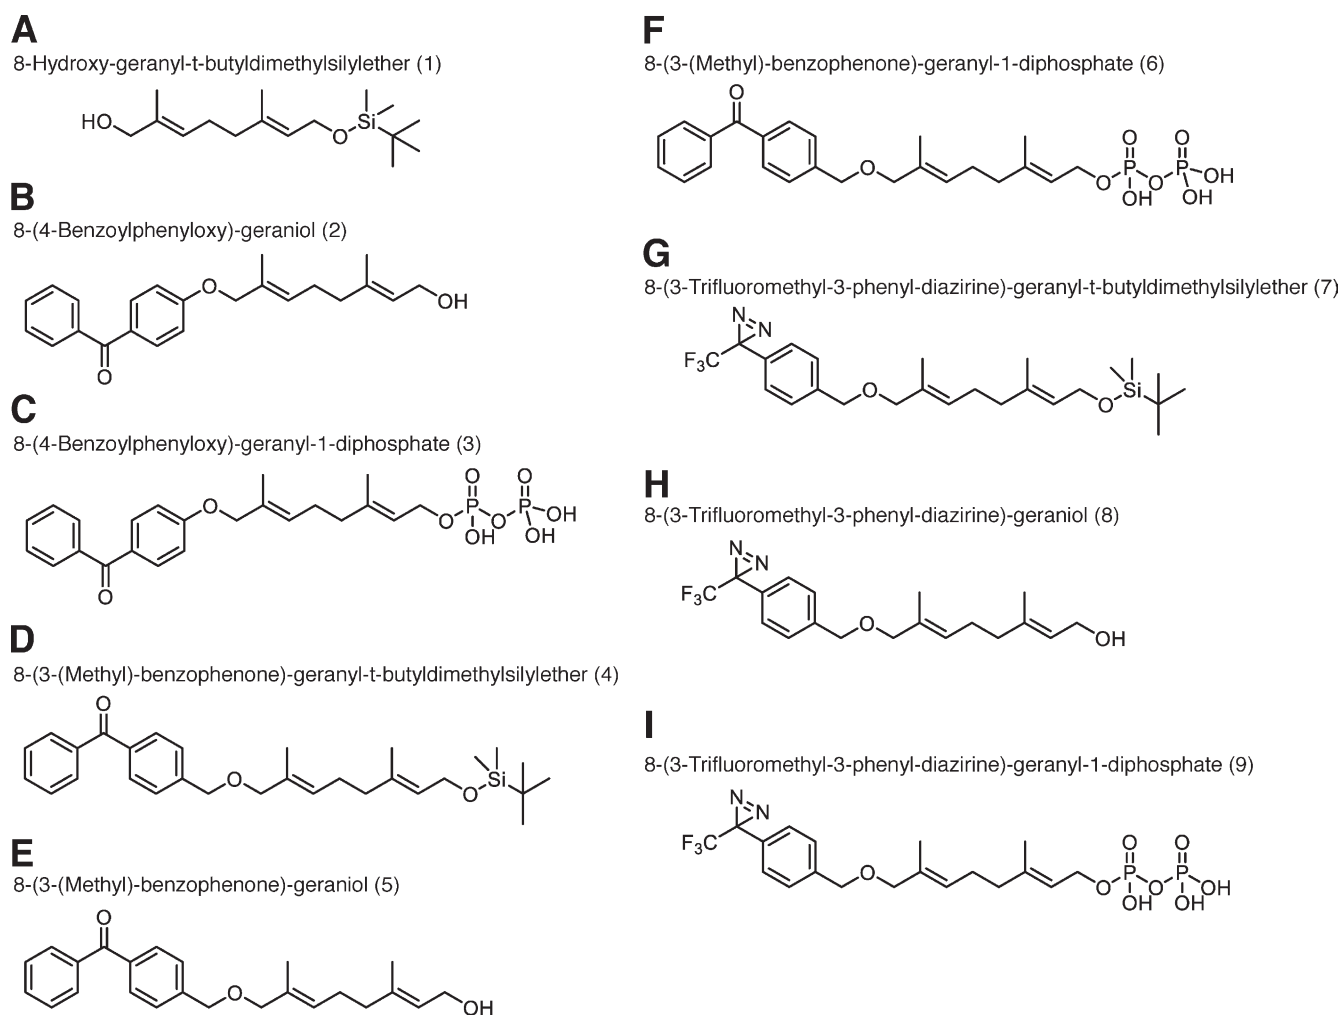

Figure S5. **Synthesis of photoactivatable probes.** (A–I) Structures of the chemicals used to generate photoactivatable probes as described in the Synthesis of the photoactivatable probes section of Materials and methods are shown as follows: 8-hydroxy-geranyl-*t*-butyldimethylsilylether (A), 8-(4-benzoylphenoxy)-geraniol (B), 8-(4-benzoylphenoxy)-geranyl-1-diphosphate (C), 8-(3-(methyl)-benzophenone)-geranyl-*t*-butyldimethylsilylether (D), 8-(3-(methyl)-benzophenone)-geraniol (E), 8-(3-(methyl)-benzophenone)-geranyl-1-diphosphate (F), 8-(3-trifluoromethyl-3-phenyl-diazirine)-geranyl-*t*-butyldimethylsilylether (G), 8-(3-trifluoromethyl-3-phenyl-diazirine)-geraniol (H), and 8-(3-trifluoromethyl-3-phenyl-diazirine)-geranyl-1-diphosphate (I).

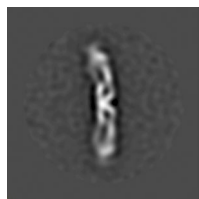

Video 1. **Montage of cryo-EM RZZ class averages with similar orientations shows considerable flexibility.** The class averages were calculated in Relion 1.4 and show large-scale movement of the two arms. Most notably, the arms are independently flexible. The central region of RZZ seems to be more rigid, although slight deformations are also observable in this region. This video was shot at 20 frames per second.

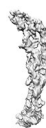

Video 2. **Fitting of molecular model into the EM density.** This video was shot at 24 and 96 frames per second.

Table S1. Summary of homology modeling of ROD and ZW10 subunits

| Residues in ROD or ZW10 | Template    | PDB chain | Residues in template | Sequence identity | Confidence Hhpred | Confidence Phyre | Multi-item plate modeling | Models                                                                                |
|-------------------------|-------------|-----------|----------------------|-------------------|-------------------|------------------|---------------------------|---------------------------------------------------------------------------------------|
|                         |             |           |                      | %                 | %                 | %                |                           |                                                                                       |
| <b>ROD</b>              |             |           |                      |                   |                   |                  |                           |                                                                                       |
| 1-376                   | Sec31       | 2PM9_A    | 5-405                | 15                | 100               | 96               | Yes                       |    |
| 396-582                 | COPI β'     | 4J73_A    | 21-290               | 13                | 100               | 97               | Yes                       |    |
|                         | COPI α      | 3MKQ_B    | 649-780              | 15                | 93                | ND               |                           |                                                                                       |
| 582-1,190               | COPI β'     | 3MKQ_A    | 655-786              | 17                | 85                | 74               | No                        |    |
|                         | Sec39       | 3K8P_D    | 10-671               | 12                | 100               | 100              |                           |                                                                                       |
| 1,319-1,797             | Clathrin HC | 1X14_A    | 814-1,198            | 15                | 56                | ND               | No                        |    |
| 1,798-2,192             | Nup155      | 5A9Q_A    | 776-1,110            | 15                | 76                | ND               | Yes                       |    |
|                         | Nup145      | 4XMM_A    | 319-575              | 16                | 64                | 74               |                           |                                                                                       |
| <b>ZW10</b>             |             |           |                      |                   |                   |                  |                           |                                                                                       |
| 475-779                 | Dsl1        | 3K8P_C    | 429-675              | 14                | 100               | 100              | No                        |  |
| 54-345                  | Dsl1        | 2ETV_A    | 16-307               | 13                | 98                | 97               | Yes                       |  |
| 16-767                  | Tip20       | 3FHN_A    | 11-701               | 10                | 96                | 97               |                           |                                                                                       |

Table S2. Model fitting into cryo-EM maps

| Correlation              | Mean map value | Inside |
|--------------------------|----------------|--------|
| <b>Fitting of Zw10</b>   |                |        |
| 0.8776                   | 2.877          | 0.662  |
| 0.8316                   | 2.634          | 0.604  |
| 0.8192                   | 2.514          | 0.539  |
| 0.8171                   | 2.579          | 0.588  |
| 0.8117                   | 2.628          | 0.577  |
| 0.8090                   | 2.431          | 0.539  |
| 0.8074                   | 2.777          | 0.565  |
| 0.8069                   | 2.478          | 0.553  |
| 0.8047                   | 2.579          | 0.596  |
| 0.8022                   | 2.513          | 0.551  |
| 0.8011                   | 2.444          | 0.557  |
| 0.8010                   | 2.395          | 0.525  |
| 0.8007                   | 2.338          | 0.521  |
| 0.8006                   | 2.433          | 0.524  |
| <b>Fitting of Zwilch</b> |                |        |
| 0.9154                   | 2.654          | 0.699  |
| 0.8895                   | 2.895          | 0.780  |
| 0.8884                   | 3.113          | 0.869  |
| 0.8872                   | 2.855          | 0.785  |
| 0.8868                   | 2.875          | 0.813  |
| 0.8860                   | 3.025          | 0.735  |
| 0.8842                   | 2.981          | 0.846  |
| 0.8811                   | 2.992          | 0.760  |
| 0.8749                   | 2.788          | 0.745  |
| 0.8731                   | 2.539          | 0.723  |
| 0.8721                   | 2.544          | 0.727  |

|                                             |       |       |
|---------------------------------------------|-------|-------|
| 0.8719                                      | 2.690 | 0.766 |
| 0.8681                                      | 2.683 | 0.723 |
| 0.8679                                      | 2.580 | 0.712 |
| <b>Fitting of ROD<sup>396-1,191</sup></b>   |       |       |
| 0.8352                                      | 2.546 | 0.515 |
| 0.8348                                      | 2.547 | 0.515 |
| 0.8214                                      | 2.280 | 0.471 |
| 0.8214                                      | 2.758 | 0.528 |
| 0.8214                                      | 2.280 | 0.471 |
| 0.8214                                      | 2.758 | 0.528 |
| 0.8189                                      | 2.540 | 0.519 |
| 0.8188                                      | 2.541 | 0.520 |
| 0.8174                                      | 2.435 | 0.501 |
| 0.8173                                      | 2.436 | 0.499 |
| 0.8119                                      | 2.540 | 0.491 |
| 0.8118                                      | 2.469 | 0.492 |
| 0.8106                                      | 2.343 | 0.481 |
| 0.8106                                      | 2.343 | 0.483 |
| <b>Fitting of ROD<sup>1,319-1,797</sup></b> |       |       |
| 0.8980                                      | 3.363 | 0.662 |
| 0.8980                                      | 3.362 | 0.661 |
| 0.8976                                      | 3.369 | 0.660 |
| 0.8975                                      | 3.369 | 0.658 |
| 0.8956                                      | 3.451 | 0.694 |
| 0.8956                                      | 3.449 | 0.690 |
| 0.8956                                      | 3.449 | 0.690 |
| 0.8956                                      | 3.451 | 0.694 |
| 0.8895                                      | 3.420 | 0.710 |
| 0.8893                                      | 3.419 | 0.708 |
| 0.8891                                      | 3.424 | 0.700 |
| 0.8891                                      | 3.424 | 0.700 |
| 0.8887                                      | 3.330 | 0.690 |
| 0.8887                                      | 3.330 | 0.690 |
| <b>Fitting of RZZ</b>                       |       |       |
| 0.8655                                      | 2.796 | 0.487 |
| 0.8655                                      | 2.796 | 0.487 |
| 0.5497                                      | 1.184 | 0.205 |
| 0.5479                                      | 1.181 | 0.205 |
| 0.5408                                      | 1.248 | 0.219 |
| 0.5357                                      | 1.117 | 0.206 |
| 0.5288                                      | 1.101 | 0.201 |
| 0.5281                                      | 1.123 | 0.190 |
| 0.5280                                      | 1.116 | 0.190 |
| 0.5243                                      | 0.998 | 0.175 |
| 0.5204                                      | 1.009 | 0.181 |
| 0.5192                                      | 0.993 | 0.173 |
| 0.5128                                      | 1.023 | 0.185 |
| 0.5126                                      | 1.028 | 0.185 |

Homology models of ROD (segments 396–1,191 and 1,319–1,797), ZW10, and the crystallographic structure of Zwilch (PDB ID: 3IF8) were automatically fitted in the density using UCSF Chimera Fit in Map tool. Individual rigid-body fittings were performed using the systematic global search option starting from 10,000 random initial placements of a simulated 10.5-Å map of the proteins within the cryo-EM map. The correlation score between the simulated map and the cryo-EM map was used as a fitting metric. For each of the placements, local optimization was performed. This table reports the results for the best fits for each search model. “Correlation” is the correlation score between the simulated map and the reference map. “Mean map value” is the density map value averaged over the center positions of all the fit atoms. A higher value means the atoms sit in higher density. “Inside” corresponds to the proportion of fit map grid points that are inside the reference map contour surface. For each model, the position was attributed to the fitting structure that had the best correlation score. Additional models of ROD (segments 1–376 and 1,798–2,189) were manually fitted in the residual density.

Table S3. Table of XL-MS data

| <b>Sequence of cross-linked peptides</b> | <b>Protein 1</b> | <b>Protein 2</b> | <b>Position 1</b> | <b>Position 2</b> | <b>Distance</b> |
|------------------------------------------|------------------|------------------|-------------------|-------------------|-----------------|
| <i>Å</i>                                 |                  |                  |                   |                   |                 |
| <b>A. Intrasubunit cross-links (RZZ)</b> |                  |                  |                   |                   |                 |
| KCFDLK-LLKSR                             | ZW10             | ZW10             | 152               | 74                | 30.53           |
| RHPKLLAK-HLKSYR                          | ROD              | ROD              | 1493              | 1560              | n.d.            |
| CLKLLK-KCFDLK                            | ZW10             | ZW10             | 946               | 152               | 25.90           |

|                                                                                                                                      |        |        |      |      |       |
|--------------------------------------------------------------------------------------------------------------------------------------|--------|--------|------|------|-------|
| LDGFGDSTK <del>K</del> L <del>F</del> K <del>V</del> R                                                                               | Zwilch | Zwilch | 317  | 341  | n.d.  |
| LL <del>K</del> LTQAK <del>K</del> L <del>K</del> PK                                                                                 | ROD    | ROD    | 1653 | 1648 | 8.51  |
| LFGETTLV <del>K</del> SR <del>E</del> K <del>A</del> VIFIR                                                                           | ROD    | ROD    | 1307 | 1318 | n.d.  |
| LEEAQ <del>K</del> CL <del>K</del> L <del>L</del> K <del>S</del> R                                                                   | ZW10   | ZW10   | 143  | 74   | 25.79 |
| EQHI <del>K</del> AHEVAQAK-SPSMES <del>K</del> L <del>H</del> R                                                                      | ROD    | ROD    | 1021 | 1051 | 14.37 |
| RE <del>K</del> AEALL <del>K</del> - <del>K</del> L <del>H</del> IQYR                                                                | ROD    | ROD    | 1731 | 1738 | 10.81 |
| LL <del>K</del> LTQAK <del>K</del> L <del>K</del> PK                                                                                 | ROD    | ROD    | 1653 | 1646 | 11.03 |
| H <del>K</del> PGSTPEPIAAEVR-DGNI <del>K</del> TALKK                                                                                 | ROD    | ROD    | 1031 | 1081 | 25.88 |
| LFGETTLV <del>K</del> SR-HVVMEL <del>K</del> EK                                                                                      | ROD    | ROD    | 1307 | 1316 | n.d.  |
| <del>K</del> EHGTALYQVDLLV <del>K</del> -LL <del>H</del> <del>K</del> HR                                                             | ROD    | ROD    | 24   | 406  | 56.97 |
| AD <del>K</del> NYSVNLENL <del>K</del> -NLYQSE <del>K</del> PKQK                                                                     | Zwilch | Zwilch | 176  | 527  | 16.82 |
| RHQQ <del>I</del> <del>K</del> NFLGSCDPQVIL <del>K</del> -SLI <del>L</del> N <del>N</del> I <del>N</del> I <del>N</del> <del>K</del> | ROD    | ROD    | 2093 | 2135 | 11.79 |
| H <del>K</del> PGSTPEPIAAEVR-SPSMES <del>K</del> L <del>H</del> R                                                                    | ROD    | ROD    | 1031 | 1051 | 29.61 |
| KDTEVETL <del>K</del> HDTAAVDR-L <del>F</del> <del>K</del> V <del>R</del>                                                            | Zwilch | Zwilch | 326  | 341  | n.d.  |
| RE <del>K</del> AEALL <del>K</del> - <del>K</del> L <del>H</del> IQYRR                                                               | ROD    | ROD    | 1731 | 1738 | 10.81 |
| RVEE <del>I</del> <del>K</del> GEVCNMISK-LL <del>K</del> SR                                                                          | ZW10   | ZW10   | 35   | 74   | 26.38 |
| ILCDIQ <del>K</del> DNLQ <del>K</del> -RHPKLLAK                                                                                      | ROD    | ROD    | 971  | 1493 | 39.94 |
| DTEVETL <del>K</del> HDTAAVDR-L <del>F</del> <del>K</del> V <del>R</del>                                                             | Zwilch | Zwilch | 326  | 341  | n.d.  |
| RHHLSTVTS <del>K</del> GFAQYELFK-VEIYSGQ <del>K</del> K                                                                              | Zwilch | Zwilch | 201  | 540  | 10.60 |
| RVEE <del>I</del> <del>K</del> GEVCNMISK- <del>K</del> CFDLK                                                                         | ZW10   | ZW10   | 35   | 152  | 32.14 |
| HQQ <del>I</del> <del>K</del> NFLGSCDPQVIL <del>K</del> -SLI <del>L</del> N <del>N</del> I <del>N</del> I <del>N</del> <del>K</del>  | ROD    | ROD    | 2093 | 2135 | 11.79 |
| NDP <del>K</del> LSEDSVSVLVR-ISSE <del>K</del> ASLNPK                                                                                | ROD    | ROD    | 377  | 43   | n.d.  |
| H <del>K</del> PGSTPEPIAAEVR-LALQEEP <del>D</del> H <del>S</del> <del>K</del> E <del>G</del> K                                       | ROD    | ROD    | 1031 | 946  | 26.27 |
| V <del>K</del> LLQESYK- <del>K</del> L <del>K</del> PK                                                                               | ROD    | ROD    | 829  | 1646 | 44.94 |
| LTQAKSSTLINK- <del>K</del> YNCK                                                                                                      | ROD    | ROD    | 1658 | 701  | 50.43 |
| <del>K</del> DTEVETL <del>K</del> -L <del>F</del> <del>K</del> V <del>R</del>                                                        | Zwilch | Zwilch | 318  | 341  | n.d.  |
| HHLSTVTS <del>K</del> GFAQYELFK-VEIYSGQ <del>K</del> K                                                                               | Zwilch | Zwilch | 201  | 540  | 10.60 |
| AHEVAQAK <del>H</del> KPGSTPEPIAAEVR-SPSMES <del>K</del> L <del>H</del> R                                                            | ROD    | ROD    | 1029 | 1051 | 23.32 |
| <del>E</del> <del>K</del> AEALL <del>K</del> - <del>K</del> L <del>H</del> IQYR                                                      | ROD    | ROD    | 1731 | 1738 | 10.81 |
| HP <del>K</del> LLAK-HL <del>K</del> SYR                                                                                             | ROD    | ROD    | 1493 | 1560 | n.d.  |
| DLHVSTGEFTD <del>L</del> <del>K</del> QQLER-LSEDIDL <del>L</del> <del>K</del> SR                                                     | ZW10   | ZW10   | 96   | 74   | 10.26 |
| EQHI <del>K</del> AHEVAQAK-AL <del>K</del> DGNIK                                                                                     | ROD    | ROD    | 1021 | 1076 | 10.90 |
| VLAPELIPSILE <del>K</del> FIR-KYNCKLALSDFEK                                                                                          | ROD    | ROD    | 739  | 705  | 10.05 |
| VLAPELIPSILE <del>K</del> FIR-YNCKLALSDFEK                                                                                           | ROD    | ROD    | 739  | 705  | 10.05 |
| AHEVAQAK <del>H</del> KPGSTPEPIAAEVR-DGNI <del>K</del> TALKK                                                                         | ROD    | ROD    | 1029 | 1081 | 20.13 |
| SGTEAVLIAH <del>K</del> L <del>N</del> TEEYLR-LTQAKSSTLINK                                                                           | ROD    | ROD    | 1756 | 1658 | 38.64 |
| AHEVAQAK <del>H</del> KPGSTPEPIAAEVR- <del>K</del> CSDLFK                                                                            | ROD    | ROD    | 1029 | 1086 | 23.71 |
| AHEVAQAK <del>H</del> KPGSTPEPIAAEVR-AL <del>K</del> DGNIK                                                                           | ROD    | ROD    | 1029 | 1076 | 23.64 |
| H <del>K</del> PGSTPEPIAAEVR-EQHI <del>K</del> AHEVAQAK                                                                              | ROD    | ROD    | 1031 | 1021 | 19.67 |
| ED <del>K</del> TALIYSDGLK-TRLL <del>K</del> K                                                                                       | ROD    | ROD    | 503  | 499  | 9.78  |
| AHEVAQAK <del>H</del> KPGSTPEPIAAEVR-DGNI <del>K</del> TALK                                                                          | ROD    | ROD    | 1031 | 1081 | 25.88 |
| YQEEVPVYVP <del>K</del> WMPFK-AQ <del>K</del> GELLER                                                                                 | ZW10   | ZW10   | 719  | 597  | 23.51 |
| QALALQMS <del>K</del> QELEAELTLR- <del>K</del> CSDLFK                                                                                | ROD    | ROD    | 1063 | 1086 | 15.05 |
| DGNI <del>K</del> TALK- <del>K</del> CSDLFK                                                                                          | ROD    | ROD    | 1081 | 1086 | 8.48  |
| ENATLLH <del>K</del> VFNCR-ID <del>K</del> AWQNYDK                                                                                   | ROD    | ROD    | 1333 | 1367 | n.d.  |
| WLQNIPSQDE <del>K</del> KREK-AEALL <del>K</del> L <del>H</del> IQYR                                                                  | ROD    | ROD    | 1728 | 1737 | 16.97 |
| VIG <del>K</del> PAHLIVSLYEHPSINQR-AEALL <del>K</del> K                                                                              | ROD    | ROD    | 1768 | 1737 | 13.79 |
| AHEVAQAK <del>H</del> KPGSTPEPIAAEVR- <del>K</del> CSDLFK                                                                            | ROD    | ROD    | 1031 | 1086 | 31.02 |
| MFD <del>K</del> VLAPELIPSILEK-YNCKLALSDFEK                                                                                          | ROD    | ROD    | 726  | 705  | 20.76 |
| NFLGSCDPQVIL <del>K</del> QLEEHMNTGQLAGFSHQIR-T <del>K</del> YFQMLK                                                                  | ROD    | ROD    | 2106 | 2145 | 9.50  |
| MFD <del>K</del> VLAPELIPSILEK-KYNCKLALSDFEK                                                                                         | ROD    | ROD    | 726  | 705  | 20.76 |
| AHEVAQAK <del>H</del> KPGSTPEPIAAEVR-LALQEEP <del>D</del> H <del>S</del> <del>K</del> E <del>G</del> K                               | ROD    | ROD    | 1029 | 946  | 21.48 |
| AD <del>K</del> NYSVNLENL <del>K</del> - <del>K</del> RHHLSTVTSK                                                                     | Zwilch | Zwilch | 176  | 191  | 29.36 |
| AHEVAQAK <del>H</del> KPGSTPEPIAAEVR-LALQEEP <del>D</del> H <del>S</del> <del>K</del> E <del>G</del> K                               | ROD    | ROD    | 1031 | 946  | 26.27 |
| LALQEEP <del>D</del> H <del>S</del> <del>K</del> E <del>G</del> K-MSVA <del>K</del> TSDILK                                           | ROD    | ROD    | 946  | 957  | 9.08  |
| LQQYEEIIQSTEEFENAL <del>K</del> EMR-FL <del>K</del> GD <del>T</del> DL <del>L</del> K                                                | ZW10   | ZW10   | 376  | 382  | n.d.  |
| HHLSTVTS <del>K</del> GFAQYELFK-WRVEIYSGQ <del>K</del> K                                                                             | Zwilch | Zwilch | 201  | 540  | 10.60 |
| WLQNIPSQDE <del>K</del> KREK-AEALL <del>K</del> L <del>H</del> IQYR                                                                  | ROD    | ROD    | 1728 | 1738 | 16.62 |
| GQPNPL <del>K</del> NILNENDIVFIVEK-HHLSTVTS <del>K</del> GFAQYELFK                                                                   | Zwilch | Zwilch | 52   | 201  | 14.98 |
| TVMDEGPQV <del>F</del> APLSEES <del>K</del> N <del>K</del> - <del>K</del> YQEEVPVYVPK                                                | ZW10   | ZW10   | 705  | 708  | 7.38  |
| AHEVAQAK <del>H</del> KPGSTPEPIAAEVR-QALALQMS <del>K</del> QELEAELTLR                                                                | ROD    | ROD    | 1029 | 1063 | 34.58 |
| QALALQMS <del>K</del> QELEAELTLR-H <del>K</del> PGSTPEPIAAEVR                                                                        | ROD    | ROD    | 1063 | 1031 | 40.98 |
| AQWITYETTQEMLN <del>Y</del> A <del>K</del> TR-ED <del>K</del> TALIYSDGLK                                                             | ROD    | ROD    | 494  | 503  | 13.64 |
| SSTLINK <del>E</del> IT <del>K</del> L <del>L</del> KTQAK                                                                            | ROD    | ROD    | 1665 | 1653 | 18.11 |
| AHEVAQAK <del>H</del> KPGSTPEPIAAEVR-QALALQMS <del>K</del> QELEAELTLR                                                                | ROD    | ROD    | 1031 | 1063 | 40.98 |
| WLQNIPSQDE <del>K</del> <del>K</del> R <del>E</del> <del>K</del> AEALLK                                                              | ROD    | ROD    | 1728 | 1731 | 10.61 |
| KYQEEVPVYVP <del>K</del> WMPFK-AQ <del>K</del> GELLER                                                                                | ZW10   | ZW10   | 719  | 597  | 23.51 |
| LALSDFE <del>K</del> ENTTIVFR-MFD <del>K</del> VLAPELIPSILEK                                                                         | ROD    | ROD    | 713  | 726  | 24.01 |
| AISSIHSLWQVYF <del>S</del> <del>K</del> AWQR-KED <del>K</del> TALIYSDGLK                                                             | ROD    | ROD    | 2016 | 503  | 36.59 |



|                                                                 |         |         |      |      |       |
|-----------------------------------------------------------------|---------|---------|------|------|-------|
| TVMDEGPQVFAPLSEESKKNK-NLMTSEIHNTVKIIPDSK                        | ZW10    | ZW10    | 705  | 424  | n.d.  |
| NFLGSCDPQVILKQLEEHMNTGQLAGFSHQIR-EFGILAKTK                      | ROD     | ROD     | 2106 | 2143 | 13.80 |
| MFDKVLAPLIPSILEK-KYNCKLALSDFEK                                  | ROD     | ROD     | 726  | 701  | 13.98 |
| TVMDEGPQVFAPLSEESKKNK-NLMTSEIHNTVKIIPDSK                        | ZW10    | ZW10    | 705  | 424  | n.d.  |
| EQHIKAHEVAQAK-EGKAWR                                            | ROD     | ROD     | 1021 | 949  | 29.00 |
| IIDLIDREQGEDCLLLLKSLPPAEAEK-TSVDILKILCDIQK                      | ROD     | ROD     | 916  | 964  | 13.71 |
| DTEVETLKHDTAAVDR-LDGFQDSTKK                                     | Zwilch  | Zwilch  | 326  | 317  | n.d.  |
| IIDLIDREQGEDCLLLLKSLPPAEAEK-ILCDIQKDNLQK                        | ROD     | ROD     | 916  | 971  | 10.44 |
| QHLEMDHPKVK-LLKLTQAK                                            | ROD     | ROD     | 829  | 1653 | 48.63 |
| SAVELVQEFINDLNKLDGFGDSTKK-DTEVETLKHDTAAVDR                      | Zwilch  | Zwilch  | 317  | 326  | n.d.  |
| RHQQIKNFLGSCDPQVILK-SLILNNIINKKEFGILAK                          | ROD     | ROD     | 2093 | 2135 | 11.79 |
| TVWQLSDSSPIDHLNFHKPDFSELNLSLEER-ADKNYSVNLLENLK                  | Zwilch  | Zwilch  | 561  | 176  | n.d.  |
| <b>B. Intersubunit cross-links (RZZ)</b>                        |         |         |      |      |       |
| EVNLLNKEIMR-KYVTGAQR                                            | ROD     | ZW10    | 859  | 130  | 50.56 |
| LIVWKFPSPK-RHPKLLAK                                             | ZW10    | ROD     | 188  | 1493 | 58.45 |
| ITNININQALSILKHLK-LIVWKFPSPK                                    | ROD     | ZW10    | 1557 | 188  | n.d.  |
| NFSNMDEENYSAASKAVR-HKPGSTPEPIAAEVR                              | ZW10    | ROD     | 624  | 1031 | 59.73 |
| GDTTDLKLYAR-LFGETTLVKSRR                                        | ZW10    | ROD     | 390  | 1307 | n.d.  |
| KRHHLSTVTSK-WEPDSSKK                                            | Zwilch  | ROD     | 191  | 239  | 23.92 |
| IIDLIDREQGEDCLLLLKSLPPAEAEK-AAALAKIK                            | ROD     | ZW10    | 916  | 777  | 32.34 |
| FSGSSWIEFLNNEDDLKIDIFLQK-VEIYSGQKK                              | ROD     | Zwilch  | 550  | 540  | 36.76 |
| MSSSVISYQDLVKCFLLIQLGR-LEKEDLGTR                                | Zwilch  | ZW10    | 368  | 17   | 40.64 |
| KRHHLSTVTSK-LLHKHR                                              | Zwilch  | ROD     | 191  | 406  | 30.00 |
| NFSNMDEENYSAASKAVR-KCSDLFKYHCNADTGK                             | ZW10    | ROD     | 624  | 1092 | 22.65 |
| AHEVAQAKHKPGSTPEPIAAEVR-NFSNMDEENYSAASKAVR                      | ROD     | ZW10    | 1029 | 624  | 52.84 |
| QALALQMSKQLEAEELTLR-QVLHQLKR                                    | ROD     | ZW10    | 1063 | 634  | 40.81 |
| NFSNMDEENYSAASKAVR-CSDLFKYHCNADTGK                              | ZW10    | ROD     | 624  | 1092 | 22.65 |
| KYSEFLPSMQSAGGLITQVDK-EVNLLNKEIMR                               | ZW10    | ROD     | 45   | 859  | 28.13 |
| QLQEFSTAIEEYNCALTEKK-EVNLLNKEIMR                                | ZW10    | ROD     | 129  | 859  | 51.06 |
| NFSNMDEENYSAASKAVR-QALALQMSKQLEAEELTLR                          | ZW10    | ROD     | 624  | 1063 | 29.04 |
| AHEVAQAKHKPGSTPEPIAAEVR-NFSNMDEENYSAASKAVR                      | ROD     | ZW10    | 1031 | 624  | 59.73 |
| GDTTDLKLYAR-LFGETTLVKSRR                                        | ZW10    | ROD     | 390  | 1307 | n.d.  |
| KRHHLSTVTSK-KGMTVK                                              | Zwilch  | ROD     | 191  | 240  | 22.56 |
| DTEVETLKHDTAAVDR-VLAPLIPSILEKFIR                                | Zwilch  | ROD     | 326  | 739  | n.d.  |
| NIFHLFHDVVPYHYHKNENLQK-CSDLFKYHCNADTGK                          | ZW10    | ROD     | 528  | 1092 | 22.46 |
| CSDLFKYHCNADTGK-QVLHQLKR                                        | ROD     | ZW10    | 1092 | 634  | 30.00 |
| AWRMSVAKTSVDILK-LIAEVKGGK                                       | ROD     | SpC25   | 957  | 90   | n.d.  |
| <b>C. Intersubunit cross-links (RZZ-Spindly<sup>form</sup>)</b> |         |         |      |      |       |
| AHEVAQAKHKPGSTPEPIAAEVR-LEKEDLGTR                               | ROD     | Zw10    | 1031 | 17   | n.d.  |
| EVNLLNKEIMR-KYVTGAQR                                            | ROD     | Zw10    | 859  | 130  | n.d.  |
| AHEVAQAKHKPGSTPEPIAAEVR-LEKEDLGTR                               | ROD     | Zw10    | 1029 | 17   | n.d.  |
| LAAESKLQTEVK-LLHKHR                                             | Spindly | ROD     | 563  | 406  | n.d.  |
| LQTEVKEGK-LLHKHR                                                | Spindly | ROD     | 569  | 406  | n.d.  |
| EGKETSSKLEK-LLHKHR                                              | Spindly | ROD     | 577  | 406  | n.d.  |
| VIGKPAHLIVSLYEHPSINQR-KLFANER                                   | ROD     | Spindly | 1768 | 409  | n.d.  |
| IIDLIDREQGEDCLLLLKSLPPAEAEK-AAALAKIK                            | ROD     | Zw10    | 916  | 777  | n.d.  |
| NFSNMDEENYSAASKAVR-HKPGSTPEPIAAEVR                              | Zw10    | ROD     | 624  | 1031 | n.d.  |
| HCGKPVPPDTPACEILK-NLYQSEKPKQK                                   | ROD     | Zwilch  | 2189 | 523  | n.d.  |
| AHEVAQAKHKPGSTPEPIAAEVR-NFSNMDEENYSAASKAVR                      | ROD     | Zw10    | 1029 | 624  | n.d.  |
| NFSNMDEENYSAASKAVR-QALALQMSKQLEAEELTLR                          | Zw10    | ROD     | 624  | 1063 | n.d.  |
| GLWKNHSHESMAVR-EVELKSR                                          | ROD     | Spindly | 1952 | 69   | n.d.  |
| NFSNMDEENYSAASKAVR-CSDLFKYHCNADTGK                              | Zw10    | ROD     | 624  | 1092 | n.d.  |
| EGKETSSKLEK-LLHKHR                                              | Spindly | ROD     | 572  | 406  | n.d.  |
| ALKDGNIK-NLKKR                                                  | ROD     | Zwilch  | 1076 | 189  | n.d.  |
| TVPEGQIILAKWLEQAAR-LLAMLEQKNGEIK                                | ROD     | Spindly | 625  | 326  | n.d.  |
| HKPGSTPEPIAAEVR-EIESTKGELSQR                                    | ROD     | Spindly | 1031 | 386  | n.d.  |

Raw data for this dataset can be accessed from the web site, <http://www.ebi.ac.uk/pride/archive/login>, with username: reviewer92658@ebi.ac.uk and password: LGNXY7II. Values in the “Distance” column are C $\alpha$ -C $\alpha$  distances of cross-linked lysine residue pairs, calculated from the RZZ model. 31 Å is an arbitrary threshold that includes the maximal overall distance for the Lys C $\alpha$ -to-Lys C $\alpha$  pair plus the crosslinker (24 Å) plus an “allowance” that accounts for potential structural changes and for the limited resolution of the maps in which the model was built. Cross-links that could not be annotated on our model are indicated as n.d.

Table S4 *MAFFT* sequence alignment of the indicated *BicD2* and *Spindly* sequences

```

hsBICD1      1  MAEE.....VLQTVDPY.KTEIERLTKELETTTHEEKIQAAEYGLVVLVEKLTLLKQQ
mmBICD1      1  MAEE.....ALKTVDPY.KTEIERLTKELETTTHEEKIQAAEYGLVVLVEKLTLLKQQ
ggBICD1      1  MAEE.....VLOGADHY.KSEIERLTRELSSTTHEEKIQAAEYGLVVLVEKLTLLKQQ
hsBICD2      1  MSAPSEEEYARLVMEAPPEWLRRAEVKRLSHELAEATTREKIQAAEYGLAVLVEKHKQLKQ
mmBICD2      1  MSAPSEEEYARLVMEAPPEWLRRAEVKRLSHELAEATTREKIQAAEYGLAVLVEKHKQLKQ
ggBICD2      1  MSLGMEEEYSRLVMESEPEWLRSEIKRLFQELGTTREKIQAAEYGLAVLVEKQQLKQQ
danreBICD2   1  MSGDEGDCPGAQLVTEAGPNWLRRAEIERLSRELSSTTSREKIQAAEYGLVVLVEENQQLKQR
xtBICD2      1  MAEE.....IVI.....LRAELDRLSAELQTTADKLAQYGLAVLVEENSELKRK
xtSpindly    1  MEESE.....IVI.....TLLKLRQLKAEERIKAAQYGLLELLESQSDLQNO
hsSpindly    1  MEAD.....ITNLRNCRKAEERLKAQYGLQLVLESQNELQNO
mmSpindly    1  MEAD.....ITNLRNCRKAEERLKAQYGLQLVLESQNELQNO
ggSpindly    1  METE.....TLLNRQQLKAEENERRKAAQYGLHLLLESQNETQNO
    
```

```

hsBICD1      52  YDELEAEYDGLKQLEOLKEAFGQSFSIHRKVAEDGE TREETLLOESASKEAYYLKILE
mmBICD1      52  YDELEAEYDGLKQLEOLKEAFGQSFSIHRKVAEDGE TREETLLOESASKEAYYLKILE
ggBICD1      52  YDELEAEYDGLKQLEOLKEAFGQSFSIHRKVAEDGE TREETLLOESASKEAYYLKILE
hsBICD2      61  FEELVDEYEAIRSEMEOLKEAFGQAHNHRKVAADGESREESLIQESASKEQYVVRKYLE
mmBICD2      61  FEELVDEYEAIRSEMEOLKEAFGQAHNHRKVAADGESREESLIQESASKEQYVVRKYLE
ggBICD2      61  FEELVDEYEAIRSEMEOLKEAFGQAHNHRKVAADGESREESLIQESASKEQYVVRKYLE
danreBICD2   61  FEELVDEYEAIRSEMEOLKEAFGQAHNHRKVAADGESREESLIQESASKEQYVVRKYLE
xtBICD2      48  NSDLDSECELKLELKOMKEALAESQTNHRKVAADGESREENLLKEAASREAKLSDKIDE
xtSpindly    42  LEEQRNEMTSTIENLEQEKYSLQREVELKNRMLLESLSCEENIRQQKLCLEQLQELER
hsSpindly    41  LDKCRNEMMTMTESYOEKYTLQREVELKSRMLLESLSCECAIKQQKMHLEKLEQLSR
mmSpindly    40  LDKCHEEMMITAEKYNQEKHALQREVELKSRMLDLSLCECEALKQQKAKLEQLVQLHR
ggSpindly    41  LDMRRLELTKTEKFEQEKYSLQREVELKNRMLLESLSFECDALKQQQNVQLDKQKEHLAR
    
```

```

hsBICD1      112  MQNELKQSRVAVVTNVQANERLTAIVQDLKENNEMVELORIRMKDEIREYKFRPEARLLO
mmBICD1      112  MQNELKQSRVAVVTNVQANERLSAVVQDLKENNEMVELORIRMKDEIREYKFRPEARLLO
ggBICD1      112  MQNELKQSRVAVVTNVQANERLTAIVQDLKENNEMVELORIRMKDEIREYKFRPEARLLO
hsBICD2      121  LQTELKQLRNVLNTQSNERLASVAQELKEINQVVEIQGRLLRDIKEYKFRPEARLLO
mmBICD2      121  LQTELKQLRNVLNTQSNERLTSVAQELKEINQVVEIQGRLLRDIKEYKFRPEARLLO
ggBICD2      121  LQTELKQLRNVLNTQSNERLNSVAQELKEANQVVEIQARLLRDIKEYKFRPEARLLO
danreBICD2   121  LQSDLRQAKNTLTGTQANERLATLALALENNEIVELORSRLRDIKEYKFRPEARLLO
xtBICD2      108  LHSELKQLKSFRTNTTSNERLHLVIONIKKEYGETEKEKAKLREIKQCKISEMRLO
xtSpindly    102  NHHRELSEIKDKLEKLLKALDEARLSEKQLK.....HKLEYQSEVLANKSEELRMS
hsSpindly    101  SHGQEVNEKTKTEKLVLEDEARLSEKQLK.....HQVDHOKELLSCKSEELRMS
mmSpindly    100  SHRQEVSDLNKLENLKVLDEARLSEKQLK.....QKLDLQELLLAKSEELRMS
ggSpindly    101  VHGQEVNDLKHKLENLKALDETRLSEKQLR.....HKVDCQKEIIAAKTEELHMS
    
```

```

hsBICD1      171  D...YTELEEENITLQKLVSTLKNQVVEYEGKHEIKRFEETVVLNSQLEDATRLKEI
mmBICD1      171  D...YTELEEENITLQKLVSTLKNQVVEYEGKHEIKRFEETVVLNSQLEDATRLKEI
ggBICD1      171  D...YTELEEENITLQKLVSTLKNQVVEYEGKHEIKRFEETVVLNSQLEDATRLKEI
hsBICD2      180  D...YSELEEENISLQKQVSVLRNQVVEFEGKHEIKRLEETEFNSQLEDATRLKEI
mmBICD2      180  D...YSELEEENISLQKQVSVLRNQVVEFEGKHEIKRLEETEFNSQLEDATRLKEI
ggBICD2      180  D...YTELEEENICLQKQVSVLKNQVVEFEGKHEIKRLEETEFNSQLEDATRLKEI
danreBICD2   180  D...YTELEEENISLQKQVSTLKGQVVEFEGKHEINRRLEEEVQYNSQLEDATRLREI
xtBICD2      167  E...FSDLLEEENISLQKQVSVLKNQVVEFEGIKHEIKRRAEIDVLDNGVVEELRLRDI
xtSpindly    154  E.RVHETMSSMLTLQLEKTELESKANLEQEVNQLQYRQQLLLTNGTQSRQLERLQDE
hsSpindly    153  E.RVQESMSSMLLALQIELETMESMRTTLKKEVNLQYRQQLLELITNLMRQVDRLEKE
mmSpindly    152  EQRVLSMSSMLLALQIELETAEAGVKNALKEEVNLQYKQEQLECLNTSLLHQVDRLEKE
ggSpindly    153  E.RVHETMSSMLNLQOMELETESVKANVEEKLNLQYKQEQLECLNSLNLQLERLQGE
    
```

```

hsBICD1      227  AEHQLEEAL...ETLKNEREQKNNRKETSQYISLNDN...HISISVDGLKFAED..GS
mmBICD1      227  AEHQLEEAL...ETLKNEREQKNNRKETSQYINLSDS...HISISVDGLKFAED..GS
ggBICD1      227  AEHQLEEAL...ETLKNEREQKNNRKETSQYINLSDSMYNNHINISVDGLKFAED..TS
hsBICD2      236  SERQLEEAL...ETLKTEREQKNSLRKETSHYMSINDSFYTSHLHVSGLKFSDD...AA
mmBICD2      236  SERQLEEAL...ETLKTEREQKNSLRKETSHYMSINDSFYTSHLQVSLDGLKFSDDVTA
ggBICD2      236  SERQLEEAL...ETLKTEREQKNSLRKETSHYMNINDSMYNSHLNSLSDGLKFSDE...AT
danreBICD2   236  ADRQLTEAL...ETVKTEREQKAAKREKTHHMTLGDSL...LASSLDGLKLS...AD
xtBICD2      223  SERQLEEAL...ESLKSEREQKLELQRELSAFLNVDYSG.....NLHG.....NF
xtSpindly    213  KEDREKEAVGYFKALEKAREANODLQAQLDIALQO.....AQ
hsSpindly    212  KEREKEAVSYNALEKAREANODLQVQLDQALQO.....AL
mmSpindly    212  KEREKEAVSYNALEKAREANODLQVQLGHALQO.....AA
ggSpindly    212  KEREKEAVSYNALEKAREANODLQVQLDQVQO.....SL
    
```

hsBICD1 278 EPNNDDK...MNGHIHGPLVK.LNGDYRTPTLRKGESLNP...VSDLFSGLNISEIQK  
mmBICD1 278 EPNNDDK...MNGHIHGPLGK.LNGDYRTPTRKGESLHP...VSDLFSGLNISEIQK  
ggBICD1 282 EPNNDDK...MNGHIHGSLVK.LNGDYRTPTRKGESLHP...VSDLFSGLNISEIQK  
hsBICD2 291 EPNNDAE..ALVNGFEHGGGLAK.LPLDNKTSTPKKEGLAPPSPSLVSDLFSGLNISEIQK  
mmBICD2 293 EPNNDAE..ALVNGFEHSGLVK.SSLDNKTSTPKKDGLAPPSPSLVSDLFSGLNISEIQK  
ggBICD2 291 EPNNDEI...MNGFDQNCLSKHSNGKNTSTPKKNEGFPPAPSLVSDLFSGLNISEIQK  
danreBICD2 285 EPNNDDAILTLENGFAK..VCEGNDENRSLSSPKRDENFRPAPSLVDDLFTGLNISEIQK  
xtBICD2 265 EDHNEEE...FDSGYNFG.ISK.TNGEILMSTPRNSDIYHPGPKAALNLFTEGLNLPETIQK  
xtSpindly 250 DPNSKGN.....SIFA  
hsSpindly 249 DPNSKGN.....SIFA  
mmSpindly 249 DPNSKGN.....SIFA  
ggSpindly 249 DPTS KGN.....SIFA

hsBICD1 329 LKQQLMVEREKAILLANIQESOTOLEHTKGALEQHERVHRTEHVNAMRGLQSSKELK  
mmBICD1 329 LKQQLIQVEREKAILLANIQESOTOLEHTKGALEQHERVHRTEHVNAMRGLQNSKEIK  
ggBICD1 333 LKQQLMVEREKAILLANIQESOTOLEHTKGALEQHERVHRTEHVNAMRGLQSNKEMK  
hsBICD2 348 LKQQLMVEREKAGLLATLQDTOKOLEHTRGSLSEQEKVTRTENLSALRRLQASKERQ  
mmBICD2 350 LKQQLVOMERKVGLLATLQDTOKOLEHTRGSLSEQEKVTRTENLSALRRLQASKERQ  
ggBICD2 347 LKQQLVOMERKVNLLTTLQESQKOLENTRGALSEQHEKVGRTTENLNAMKRLQVSKERQ  
danreBICD2 343 LKQQLQVEREKVALLTTLQESQKOLEHARGALAEQOEAMTRSDDLGAMRRLQAGKERQ  
xtBICD2 320 LQQLLQVDRKASVMADLEGLKNNLDVATEALSKEQKQNGELEQINALKEDLDNSGRK  
xtSpindly 262 VEDRRAEMERQLISMKVQFQSLQKHAFSRQOMHRMKVQIATLQ...LKGSQSDPEQL  
hsSpindly 261 VEDRRAEMERQLISMKVQFQSLQKHAFSRQOMHRMKVQIATLQ...MKGSQTEFEQQ  
mmSpindly 261 VEDRRAEMERQLNLMKDKYQSLKKQNAFTRDQNMKMKLQISTLR...MRGSQTEFEQQ  
ggSpindly 261 VEDRRAEMERQLISVKIKYQSLQKHAFTRDQNMKMKLQMATLQ...MKGSQAEFEQL

hsBICD1 389 AELDGEKGRDSGEEA..HDYEVDINGEILECKYRVAVTEVIDIKAEIKAKKEKYNKSVE  
mmBICD1 389 AELDCEKGRNSAEEA..HDYEVDINGEILECKYRVAVTEVIDIKAEIKAKKEKYNKSVE  
ggBICD1 393 TEHDCEKGRDPSEEA..HDYEVDINGEILECKYRVAVTEVIDIKAEIKAKKEKYNKSVE  
hsBICD2 408 TALDNEKDRDSDHEDG..DYEVDINGEILECKYRVAVTEVIDIKAEIKAKKEKYNKSVE  
mmBICD2 410 TSLDNEKDRDSDHEDG..DYEVDINGEILECKYRVAVTEVIDIKAEIKAKKEKYNKSVE  
ggBICD2 407 SALDNEKDRDSDHEDG..DYEVDINGEILECKYRVAVTEVIDIKAEIKAKKEKYNKSVE  
danreBICD2 403 SALDSEKDRDSDHEDG..DYEVDINGEILECKYRVAVTEVIDIKAEIKAKKEKYNKSVE  
xtBICD2 380 C.....ETEVFKCQCKQENTEASRIKKELEKLELQOYQDLKK  
xtSpindly 318 ERLLQAMVAQKNSEFETLVMKVRQLEKSSQICE  
hsSpindly 317 ERLLAMLEQKNGEIKHLGELRNLKLEKFNLYD  
mmSpindly 317 ERLLFAMIEQKNGEIKHLGELRNLKLEKFNLYD  
ggSpindly 317 ERLLQSMLEQKNGEILENLLVQVVRQLEKFKTLYE

hsBICD1 447 NYTDEKAKYESKI...QMYDEQVTSLEKTTKESGEKMAHMEKELQKMTSIANENHSTL  
mmBICD1 447 NYTEKTKYESKI...QMYDEQVTSLEKTTKESGEKMAHMEKELQKMTSIANENHSTL  
ggBICD1 451 NYTEKAKYESRI...QTYNEQVTSLEKTTKESGEKMAHMEKELQKMTSIANENHSTL  
hsBICD2 466 QHAEKGRYEAG...QALTEKISLEKASRQDRELLARLEKELKVVSDVAGETQGS  
mmBICD2 468 QHAEKGRYEAG...QALTEKISLEKASRQDRELLARLEKELKVVSDVAGETQGS  
ggBICD2 465 KYEAKSRYETES...QALTEKIASLEKASRHDREQVAREKELKVVSDVAGETQGS  
danreBICD2 463 EHEVVRTRLEGHV...RDLSIQVSLQLEYSRTDRDKVAKLEKELKVVSDVAGETQGS  
xtBICD2 416 QYKDEKAEWEASM...QEVTERLSLYMKCERSDQGLLGELEQEDLKTLRRSYCDVQSK  
xtSpindly 350 NG...PVANSDDGLGQGDETYVDLLKMKLVNSKIEIKDELQRMKALA.ESQRV  
hsSpindly 349 SMESKPSVDSG..TLEDNTYYTDLQMKLNLNKEIESTKGEISLQRMKALF.ESQRAL  
mmSpindly 349 SMESRPSTSDTAC.VLEDSTYYTDLQMKLNLNKENESTKDELSLQRMKALF.ESQRAL  
ggSpindly 349 NMEECRASTSSKG.GESEDDGYADLQMKLNLNKNKETETLKNELSLQRMKALY.ESQRV

hsBICD1 502 NTAQDELVTFSSELAQLYHHVCLCNETPN.RVMLDYYRQSRVTRSGSLKGPDDPRGLLS  
mmBICD1 502 NTAQDELVTFSSELAQLYHHVCLCNETPN.RVMLDYYRQSRVTRSGSLKGPDDPRGLLS  
ggBICD1 506 NTAQDELVTFSSELAQLYHHVCLCNETPN.RVMLDYYRQSRVTRSGSLKGPDDPRGLLS  
hsBICD2 521 SVAQDELVTFSSELANLYHHVCMCNETPN.RVMLDYYRREG...QGAG...  
mmBICD2 523 NVAQDELVTFSSELANLYHHVCMCNETPN.RVMLDYYRREG...QGAG...  
ggBICD2 520 SVAQDELVTFSSELANLYHHVCMCNETPN.RVMLDYYRREG...QGAG...  
danreBICD2 518 SVAQDELVAFSSELANLYHHVCMCNETPN.RVMLDYYRREG...QGAG...  
xtBICD2 471 NLAQDELMSFTEELAHLYHHVCMRNSLTPN.RVMLDYYRREG...QGAG...  
xtSpindly 406 DL...ERKLEFAND...RHLKLSQGENMKLRVNLDEMK...  
hsSpindly 405 DI...ERKLEFANE...RHLQLESENMKLRKLDDELK...  
mmSpindly 407 DI...ERKLEFANE...RHLQLESENMKLRKLDDELK...  
ggSpindly 407 EV...ERKLEFANE...RHLQACQSENMNLRVMLDELK...

hsBICD1 561 PRLARRGVSSP.VETRTSSEPVAKESTEASKEPSPTKTPTTISPVITAPPSSPVLDTSDI R  
mmBICD1 561 PRLSRRGVSSP.VESRTSSEPVSKEENTETSKEPSPTKTPTTISPVITAPPSSPVLDTSDI R  
ggBICD1 565 PRLARRGMASP.VEARTPTEQVTKEAAEPGKEQSPKTPTTISPVITAPPSSPVSDSDI R  
hsBICD2 566 .RTSPGGRTSPEARGRSPILLPKGLLAPEAGRADGGTGDSSP...SPGSSLPSPLSDP R  
mmBICD2 567 .....GRTSPEGRGRRSPVLLPKGLLATEVGRADGGTGDNSP...SPSSSLPSPLSDP R  
ggBICD2 562 .....GRSSPEAKGRRSPVLLPKGLLTDLTKAENGSGDSSP...SPVSSLPSVSDP R  
danreBICD2 560 .....SKTETKDRQSTL.....TQTNESKAQT.....SRSNSIPVDREFF R  
xtBICD2 513 .....SKLHFRKRKSSDFFGKLLVSPDMEITEIHSGECSF.LSSPASSIGSDCGDSS  
xtSpindly 437 ..... M K  
hsSpindly 436 ..... L K  
mmSpindly 438 ..... L K  
ggSpindly 438 ..... M K

hsBICD1 620 K E P MNIYNLNAIIRDQIKHLQKAVDRSLQLSRQRAAAARELAPMIDKDKKEALM E I L K L K S  
mmBICD1 620 K E P MNIYNLNAIIRDQIKHLQKAVDRSLQLSRQRAAAARELAPMIDKDKKEALM E I L K L K S  
ggBICD1 624 K E P MNIYNLNAIIRDQIKHLQKAVDRSLQLSRQRAAAARELAPMIDKDKKEALM E I L K L K S  
hsBICD2 622 R E P MNIYNLIAIIRDQIKHLQAAVDRTELSRQRIASQELGPAVDKDKKEALM E I L K L K S  
mmBICD2 618 R E P MNIYNLIAIIRDQIKHLQAAVDRTELSRQRIASQELGPAVDKDKKEALM E I L K L K S  
ggBICD2 613 K E P MNIYNLIAIIRDQIKHLQAAVDRTELSRQRIASQELGPAVDKDKKEALM E I L K L K S  
danreBICD2 596 P E P MDVYNLVAIIRDQIRHLQKAVDRTELSRQRIASLELAADVADKQAACM E I L K L K S  
xtBICD2 564 R E P LSITHLIAIVKDKIKHLQGAII...VVSQHTSLESIASSEMDDKKEVLV D E I M K L K S  
xtSpindly 439 Y E P ..... D E I A K I R T  
hsSpindly 438 Y E P ..... E E T V E V P V  
mmSpindly 440 Y E P ..... E E R I E V P V  
ggSpindly 440 Y E P ..... E E L L K V T K

hsBICD1 680 L L S T K R E Q I A T L R A V L K A N K Q T A E V A L A N . . L K N K . Y E N . . . E K A M V T E T M T K L R N E L K A  
mmBICD1 680 L L S T K R E Q I A T L R A V L K A N K Q T A E V A L A N . . L K N K . Y E N . . . E K A M V T E T M T K L R N E L K A  
ggBICD1 684 L L S T K R E Q I A T L R A V L K A N K Q T A E V A L A N . . L K N K . Y E N . . . E K A M V T E T M T K L R N E L K A  
hsBICD2 682 L L S T K R E Q I T T L R T V L K A N K Q T A E V A L A N . . L K S K . Y E N . . . E K A M V T E T M M K L R N E L K A  
mmBICD2 678 L L S T K R E Q I T T L R T V L K A N K Q T A E V A L A N . . L K S K . Y E N . . . E K A M V T E T M M K L R N E L K A  
ggBICD2 673 L L S T K R E Q I A T L R T V L K A N K Q T A E V A L A N . . L K S K . Y E N . . . E K A M V T E T M M K L R N E L K A  
danreBICD2 656 L L S T K R E Q I A T L R T V L K A N K Q T A E V A L A N . . L K S K . Y E N . . . E K A M V T E T M M K L R N E L K A  
xtBICD2 620 L L S T K R E Q I A T L R T V L K A N K Q T A E V A M S N . . L K S K . Y E N . . . E K A L V S D T M V K L R H E L K A  
xtSpindly 450 . . . . . Q K R R K E Q L P L D C A I D N T S A T V T S G S Q A H . G L S D A I P E D M C P A E S T V H R N L L K E D S S L . S  
hsSpindly 449 . . . . . L K R R R E V L P V D I T T A K D A C V N N S A L G G E . . . V Y R L P P O K . . . E E T Q S C P N S L E . D N N L . Q  
mmSpindly 451 . . . . . L K R R R E V L P N I T T P E E T E T A A S A T E D G V S R L P P H R . . . E E . E S C L N S L K . D N T V . Q  
ggSpindly 451 . . . . . I K K R R E K I P V D A T C E Y L D S K N T S V D E A P . . . L T H L . P S K . . . E E A K M T S N N L E Q I D S S . S

hsBICD1 734 L K E D A A T F S S L R A M F A T R C D E Y V T Q L D E M Q R Q L A A A E D E K K T . . . . . L N T I L L  
mmBICD1 734 L K E D A A T F S S L R A M F A T R C D E Y V T Q L D E M Q R Q L A A A E D E K K T . . . . . L N T I L L  
ggBICD1 738 L K E D A A T F S S L R A M F A T R C D E Y V T Q L D E M Q R Q L A A A E D E K K T . . . . . L N S I L L  
hsBICD2 736 L K E D A A T F S S L R A M F A T R C D E Y I T Q L D E M Q R Q L A A A E D E K K T . . . . . L N S I L L  
mmBICD2 732 L K E D A A T F S S L R A M F A T R C D E Y I T Q L D E M Q R Q L A A A E D E K K T . . . . . L N S I L L  
ggBICD2 727 L K E D A A T F S S L R A M F A T R C D E Y V T Q L D E M Q R Q L A A A E D E K K T . . . . . L N S I L L  
danreBICD2 710 L K E D A A T F S S L R A M F A T R C D E Y V T Q L D D M Q R Q L A A A E D E K K T . . . . . L N S I L L  
xtBICD2 674 L K E D A A T F S S L R S L F A S R C D Q Y V T Q L E E M Q R Q L A A A E D E K K T . . . . . L N S I L L  
xtSpindly 507 T K E Q D L S S V A V K P I E P A N . . . . . G O P P K E R K R V R I V E N E N D N Q D I N K R N T N N C S V T S T S P  
hsSpindly 501 L E K S V S I Y T P V V S L S P H K N L P V D M Q L K K E K K C V K L I G V P A D A E A L S E R S G N . . . T P N S P  
mmSpindly 504 W K Q P A S S C V Q P A S L S P H K N L H L D M Q L K K E K K C V K L V D S P A N I E V L H E Q S G N . . . T P N S P  
ggSpindly 503 R K Q A L E A S P I N I A L Q S M D K V . . . V E P E R E R K R V K T K D D S V D T C A S Y S R G G S N . F L T S S A P

hsBICD1 781 R M A I Q Q K L A L T Q R L E D L E F D H E Q S R R S K G K L . . G K S K I G S P K V S G E A S V T P T I D T Y L L H  
mmBICD1 781 R M A I Q Q K L A L T Q R L E D L E F D H E Q S R R S K G K L . . G K S K I G S P K . . . . . G K S K I G S P K . . . . .  
ggBICD1 785 R M A I Q Q K L A L T Q R L E D L E F D H E Q S R R S K G K L . . G K S K I G S P K V S E E A S A T V P T I D T F L L H  
hsBICD2 783 R M A I Q Q K L A L T Q R L E L L E L D H E Q T R R G R A K K A A . P K T K P A T P S V S H T C A . . . . .  
mmBICD2 779 R M A I Q Q K L A L T Q R L E L L E L D H E Q T R R G R S K A A . S K A K P A S P S V S H T C A . . . . .  
ggBICD2 774 R M A I Q Q K L A L T Q R L E H L E L D H E Q S K R V R T K S A . S K A K S S N P T V S H I R S . . . . .  
danreBICD2 757 R M A I Q Q K L A L T Q R L E D L E F D H E Q S R R G S G A G P G G R G K A P S G R G R G P L S F S S P H V . . . . .  
xtBICD2 721 R M A I Q Q K L A L T Q R L E G R E G A H N A S K S H S K S S . . T G K T H S A K . . . . .  
xtSpindly 562 R S A S E E S T S E S K R F D E E Q E K R K Q E R K S R L R A P . P V L H V P S K P . . . . .  
hsSpindly 557 R L A A E S K L Q . T E V K E G K E T S S K L E K E T C K K L H . P I L Y V S S K S . . . . .  
mmSpindly 560 R L T A E S K L P . T E V K E R I E T T S K L G K G A C K K S H . N I I Y V S S K S . . . . .  
ggSpindly 559 R L T T E S R F E A T E I E D K K E N V I T K K K T Q K K K Y . T T L Y V S S K P . . . . .

```

hsBICD1      839  SQGPQTPNIRVSSGTQRKRQFSPSLCDQSRPRTSGASYLQNLRLRVPPDPTSTESFLLKGF
mmBICD1      843  SQGPQQPNLLVSSGTQRKRLFSPSLCDQSHPRTSG.TYLQKLLRAPPHPASTESYLLRGP
ggBICD1      830  .....CASDRAEGTG.....L..ANQVFCSEKHSIY..
hsBICD2      826  .....CASERAEGAG.....L..ANQVFCSEKHSIY..
mmBICD2      821  .....C.GDRPEGSV.....L..NNQVFCSEKYKIY..
ggBICD2      811  ..SPRLP.....C.KNRPQPHG.....LIGSPAFCSEKYKIL..
danreBICD2   761  .....SKYI.....
xtBICD2      603  .....AATTQCPQQ.....
xtSpindly    597  .....TPETQCPQQ.....
hsSpindly    600  .....APETQCSQQ.....
mmSpindly    600  .....TPETQCAQQ.....
ggSpindly

```

```

hsBICD1      899  PSMSEFIQGHRLSKEKRLTVAPP.....DCQQPAASVPPQCSQLAGRQDCPTVSPDTA
mmBICD1      821  .....SGH.....CPQ.....
ggBICD1      902  PSMSEFIHGHRLSKEKRLTVATPVLVLFQKSSHIPALSVPLSTVSLSLLL.TPNLHMQRK
hsBICD2      854  .....CD.....
mmBICD2      850  .....CD.....
ggBICD2      844  .....CD.....
danreBICD2   841  .....CDTGSD.....
xtBICD2
xtSpindly
hsSpindly
mmSpindly
ggSpindly

```

```

hsBICD1      952  LPEEQP..HSSS.QCAPLHCLSKP...PHP
mmBICD1
ggBICD1      961  RKRKQSGVHATKVRVVPSEKVDNPALEPHR
hsBICD2
mmBICD2
ggBICD2
danreBICD2
xtBICD2
xtSpindly
hsSpindly
mmSpindly
ggSpindly

```
